# Supplementary material
Source: PubMed Central journal article supplement (PMC4201359)
Supplement: jo501982r_si_001.pdf [file jo501982r_si_001.pdf]

**Supporting Information: Interstrand Cross-Link and Bioconjugate Formation in RNA From a  
Modified Nucleotide**

Jack L. Sloane and Marc M. Greenberg\*

Department of Chemistry, Johns Hopkins University, 3400 N. Charles St., Baltimore MD 21218.

mgreenberg@jhu.edu

**Contents:**

1. **Figure S1.**  $^1\text{H}$  NMR and  $^{13}\text{C}$  NMR spectra of **8**. (S2)
2. **Figure S2.**  $^1\text{H}$  NMR and  $^{13}\text{C}$  NMR spectra of **9**. (S3)
3. **Figure S3.**  $^1\text{H}$  NMR and  $^{13}\text{C}$  NMR spectra of **10**. (S4)
4. **Figure S4.**  $^1\text{H}$  NMR and  $^{13}\text{C}$  NMR spectra of **11**. (S5)
5. **Figure S5.**  $^1\text{H}$  NMR and  $^{31}\text{P}$  NMR spectra of **12**. (S6)
6. **Figure S6.**  $^1\text{H}$  NMR of **7**. (S7)
7. **Figure S7.**  $^1\text{H}$  NMR of oxidation of **9** by  $\text{H}_2\text{O}_2$  with  $\text{H}_2\text{O}$  solvent suppression. (S8)
8. **Figure S8.** MALDI-TOF MS of **13**. (S9)
9. **Figure S9.** MALDI-TOF MS of **14**. (S9)
10. **Figure S10.** MALDI-TOF MS of **15**. (S10)
11. **Figure S11.** LC-MS of ICL **23**. (S10)
12. **Figure S12.** MALDI-TOF MS of the glycine adduct (**24a**). (S11)
13. **Figure S13.** MALDI-TOF MS of the phenylalanine adduct (**24b**). (S11)
14. **Figure S14.** Histogram of hydroxyl radical cleavage of ICL from **19a** (**23**). (S12)
15. **Figure S15.** Histogram of hydroxyl radical cleavage of ICL from **21b** (**9** opposite cytidine). (S12)
16. **Figure S16.** Histogram of hydroxyl radical cleavage of ICL from **21a** (**9** opposite guanosine). (S13)
17. **Figure S17.** Histogram of hydroxyl radical cleavage of ICL from **21c** (**9** opposite guanosine). (S13)

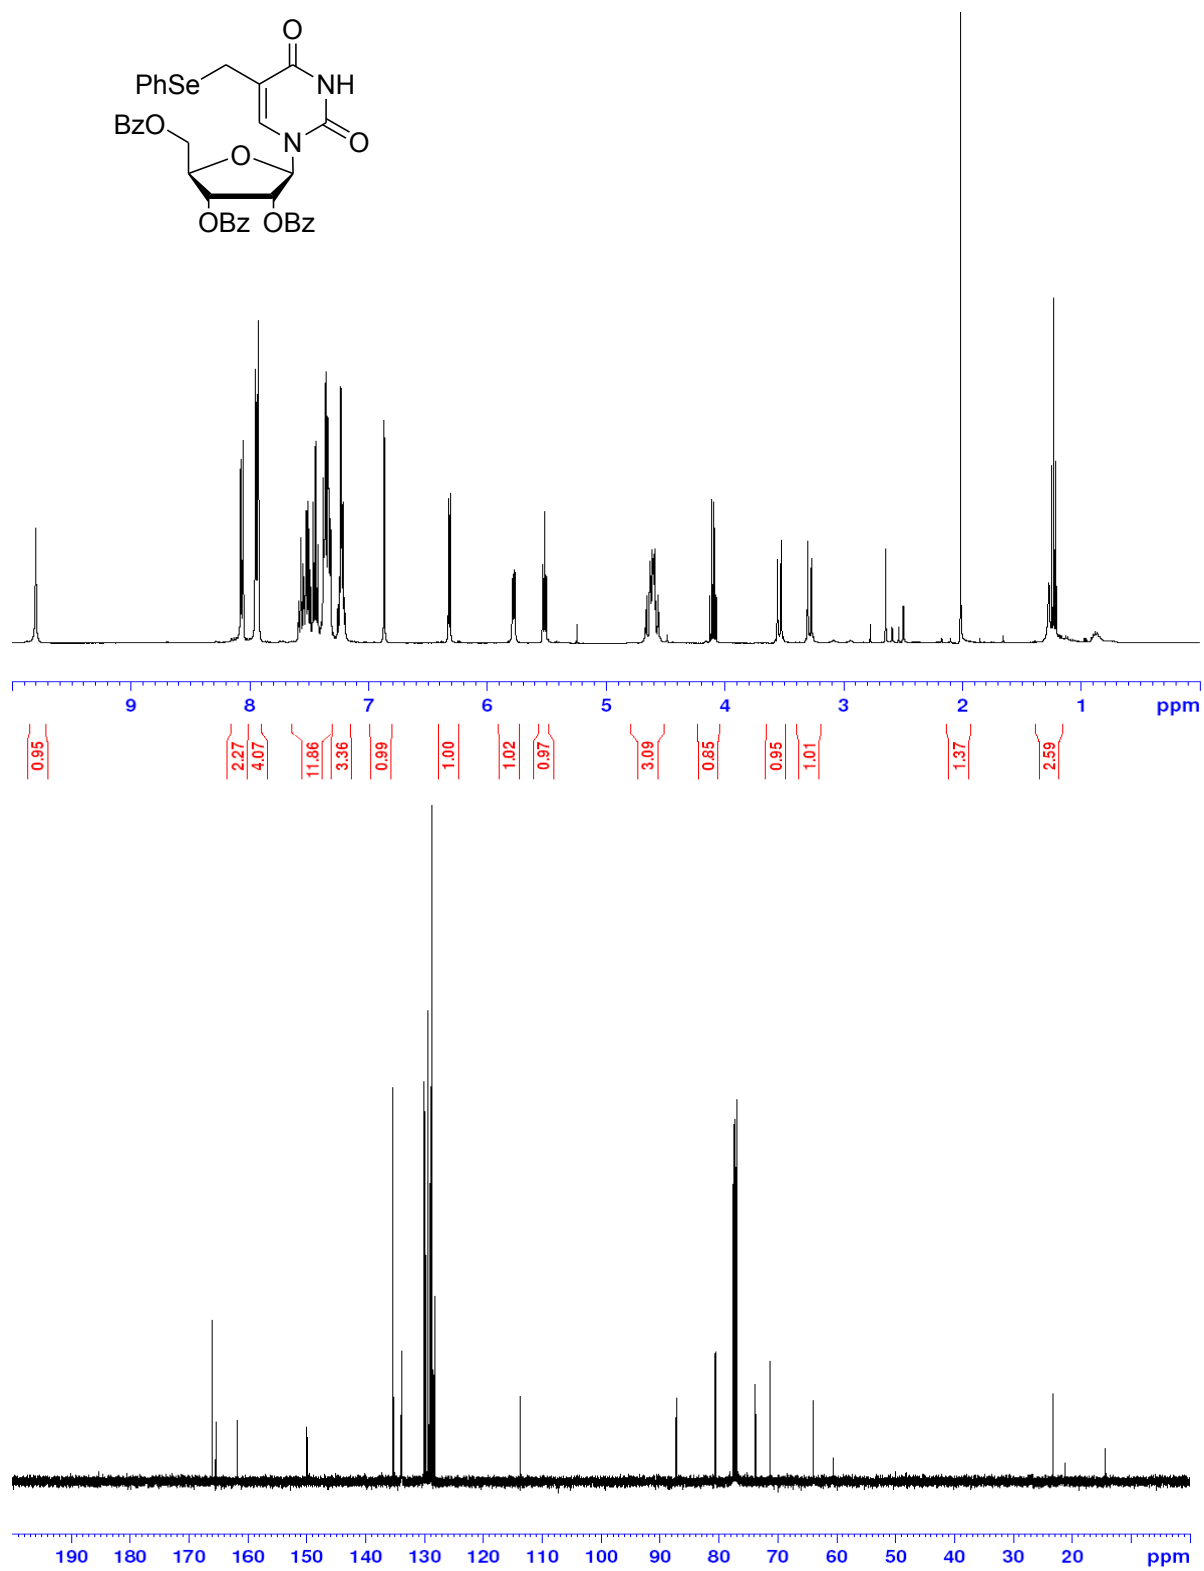

Figure S1.  $^1\text{H}$  NMR and  $^{13}\text{C}$  NMR spectra of **8**.

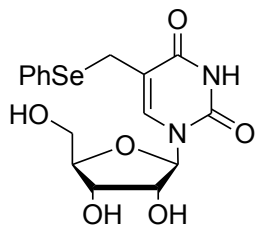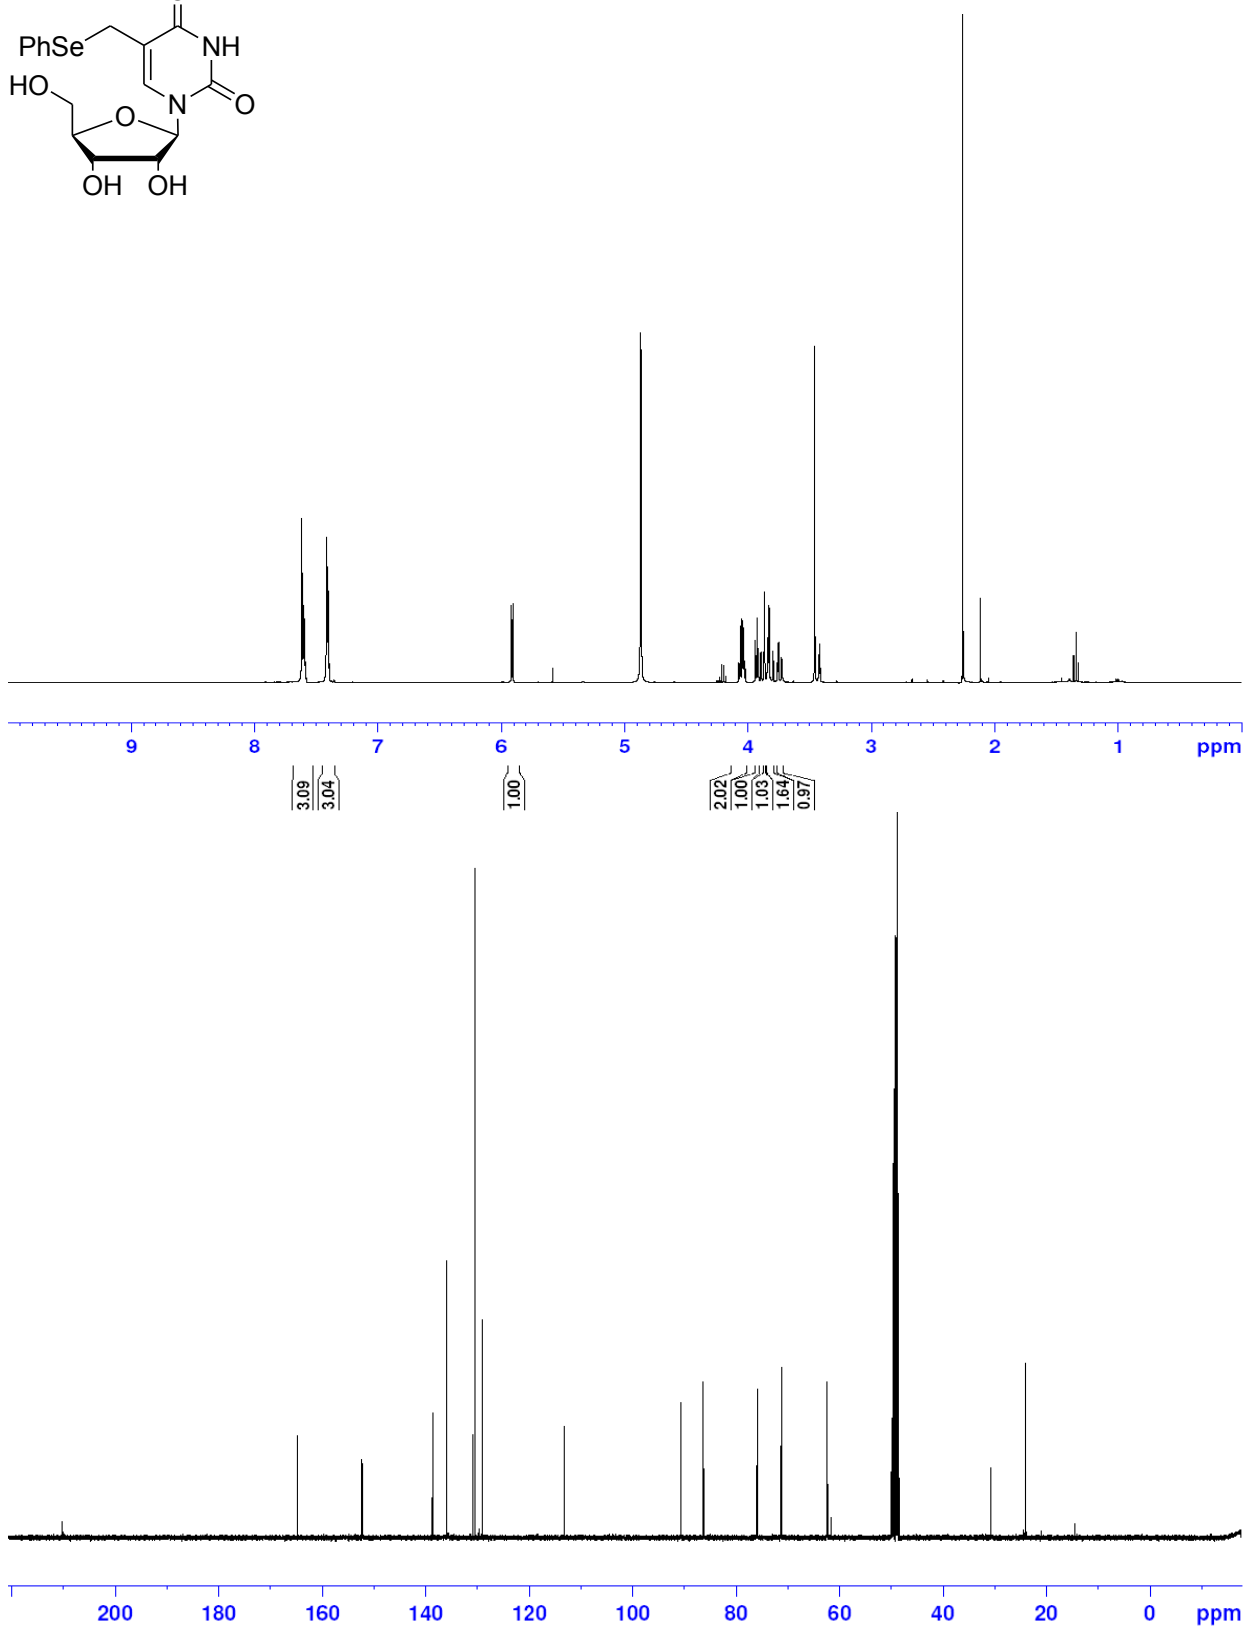

Figure S2.  $^1\text{H}$  NMR and  $^{13}\text{C}$  NMR spectra of 9.

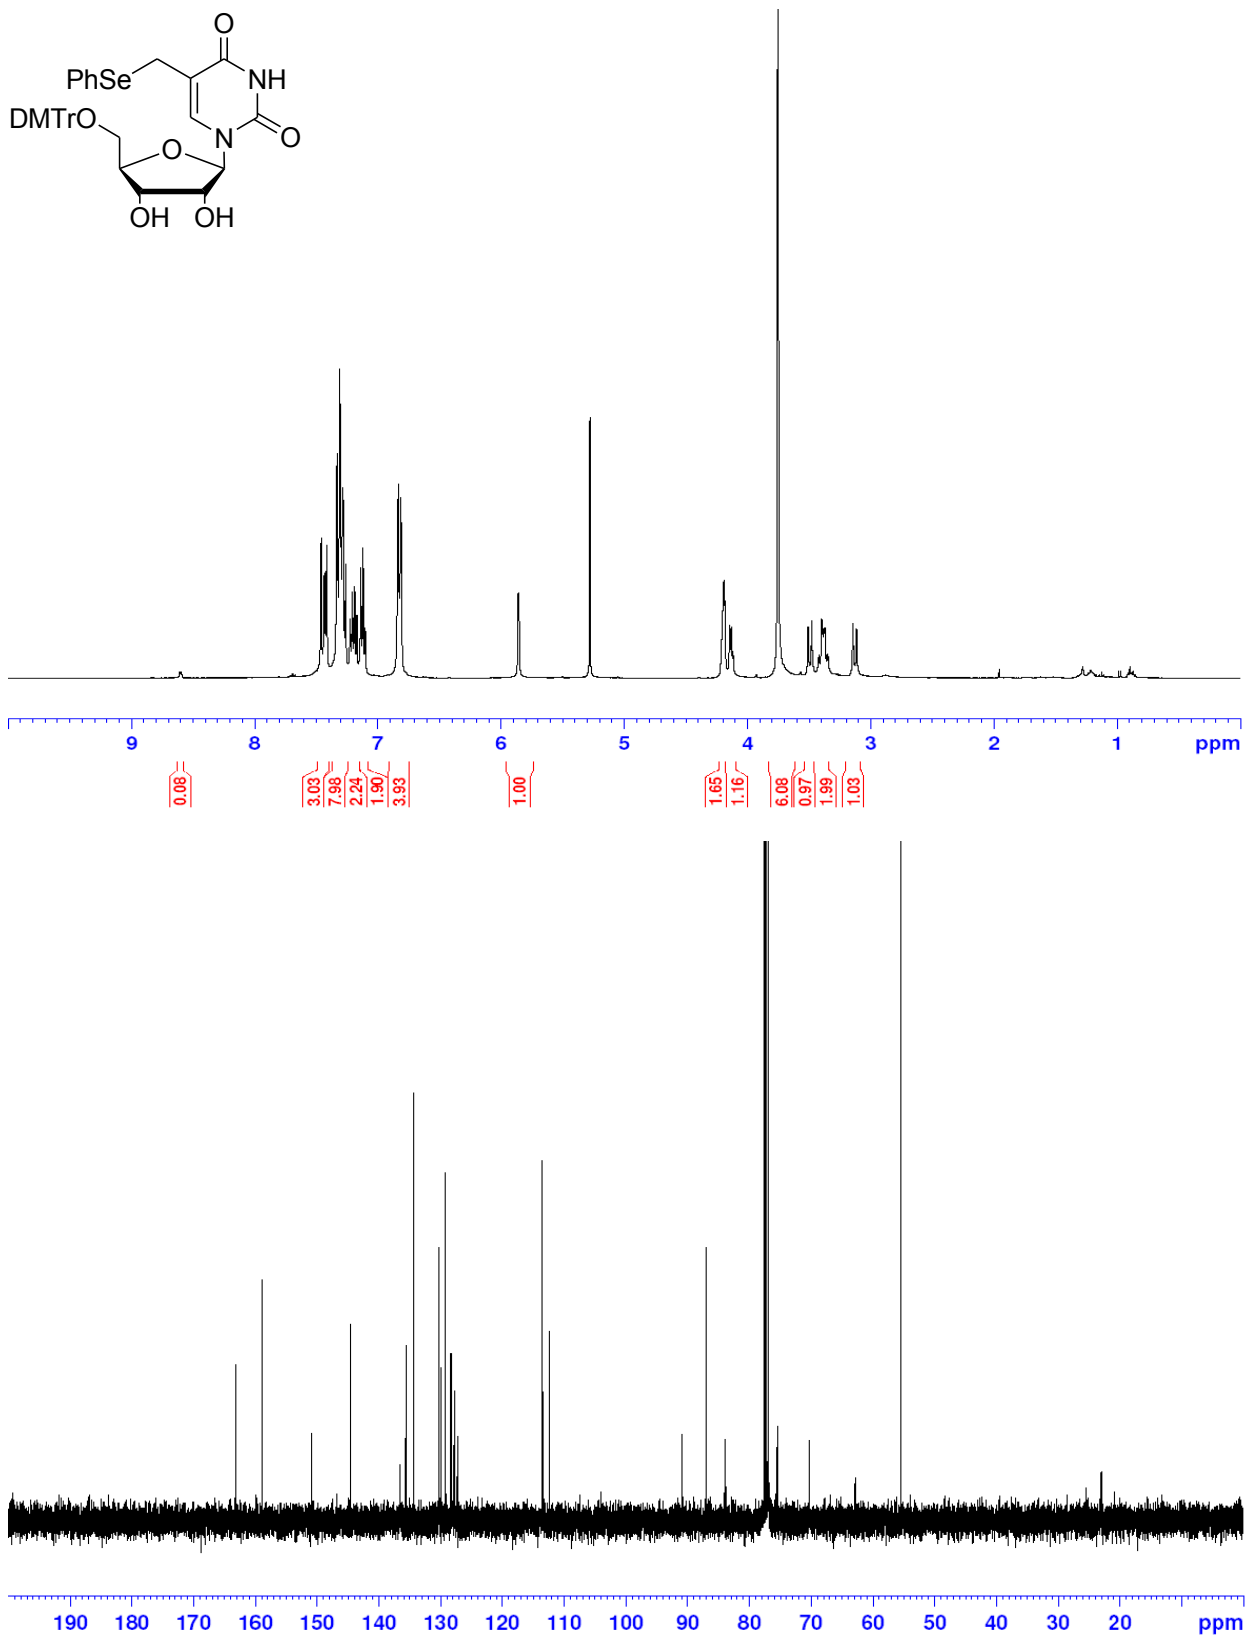

Figure S3.  $^1\text{H}$  NMR and  $^{13}\text{C}$  NMR spectra of **10**.

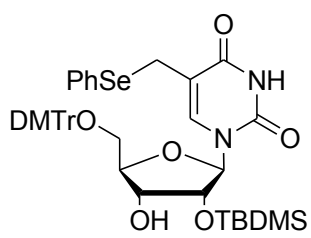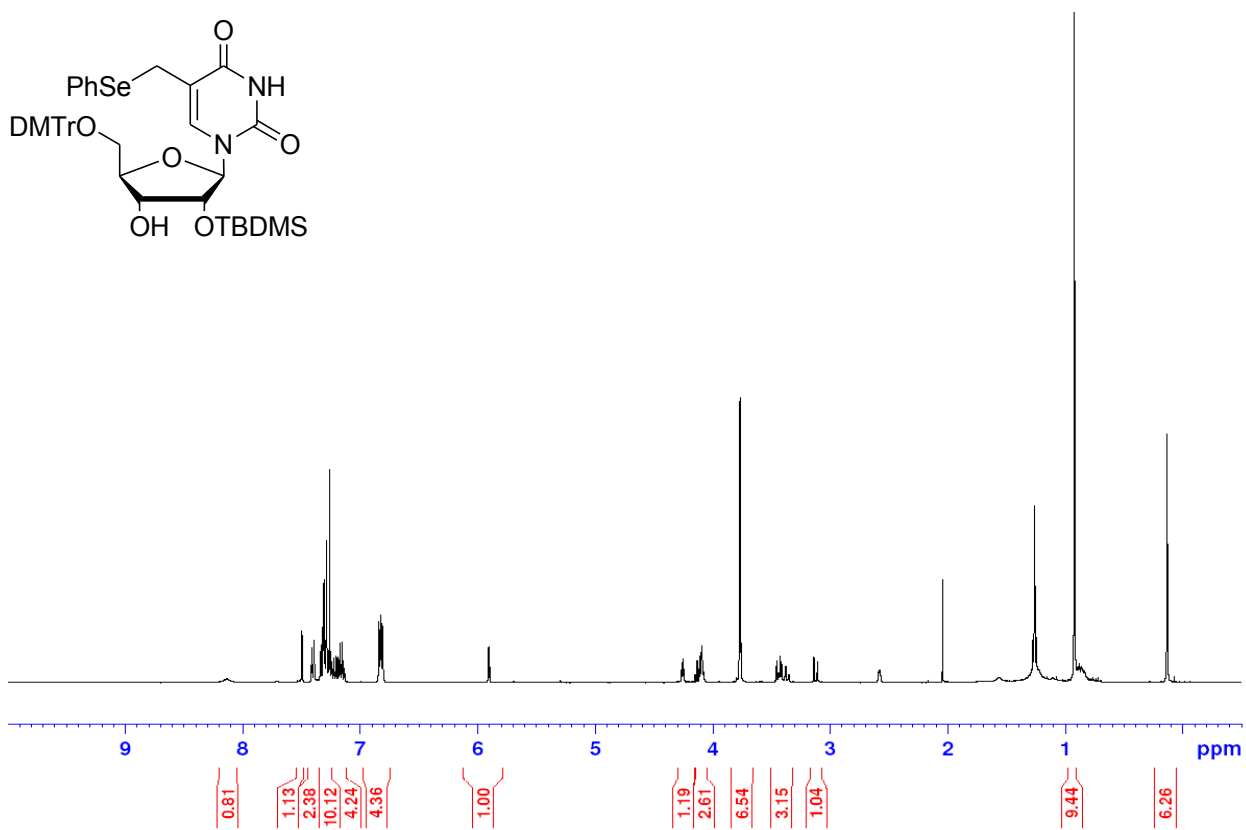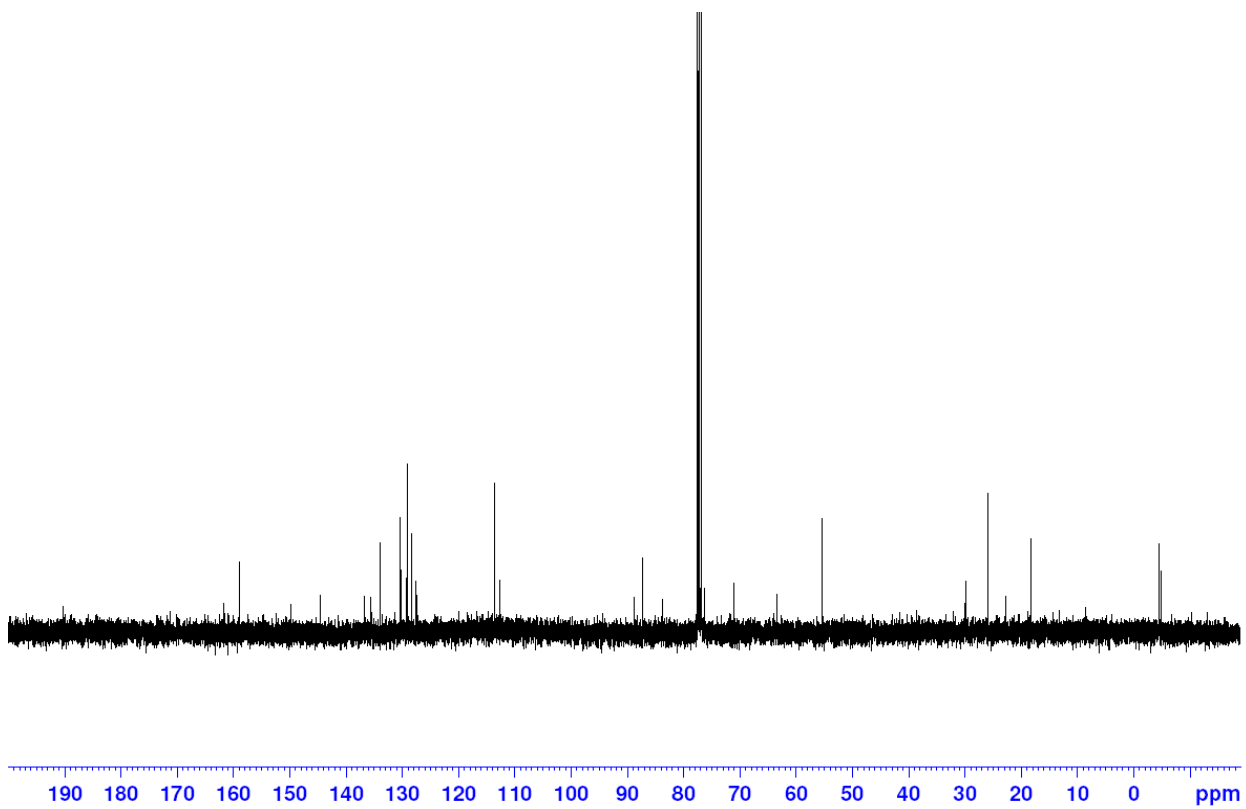

Figure S4.  $^1\text{H}$  NMR and  $^{13}\text{C}$  NMR spectra of **11**.

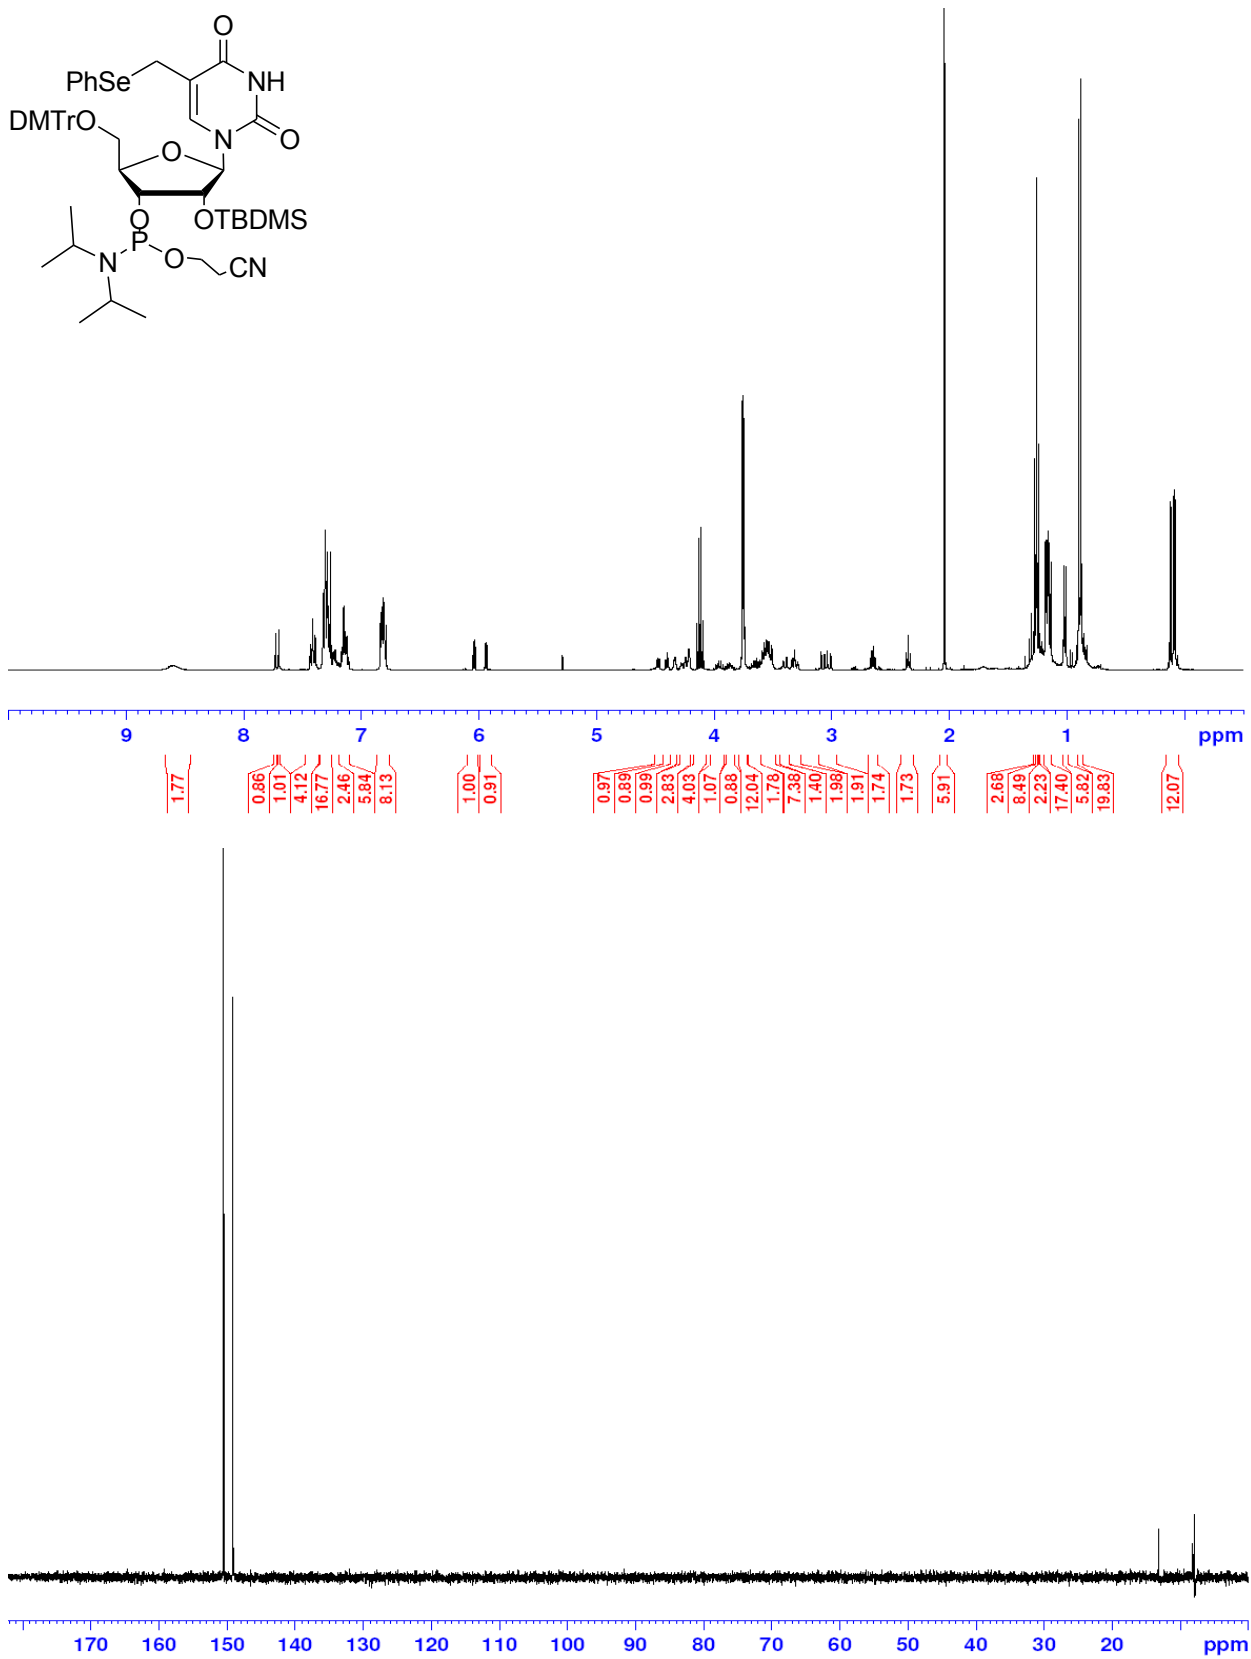

Figure S5. <sup>1</sup>H NMR and <sup>31</sup>P NMR spectra of **12**.

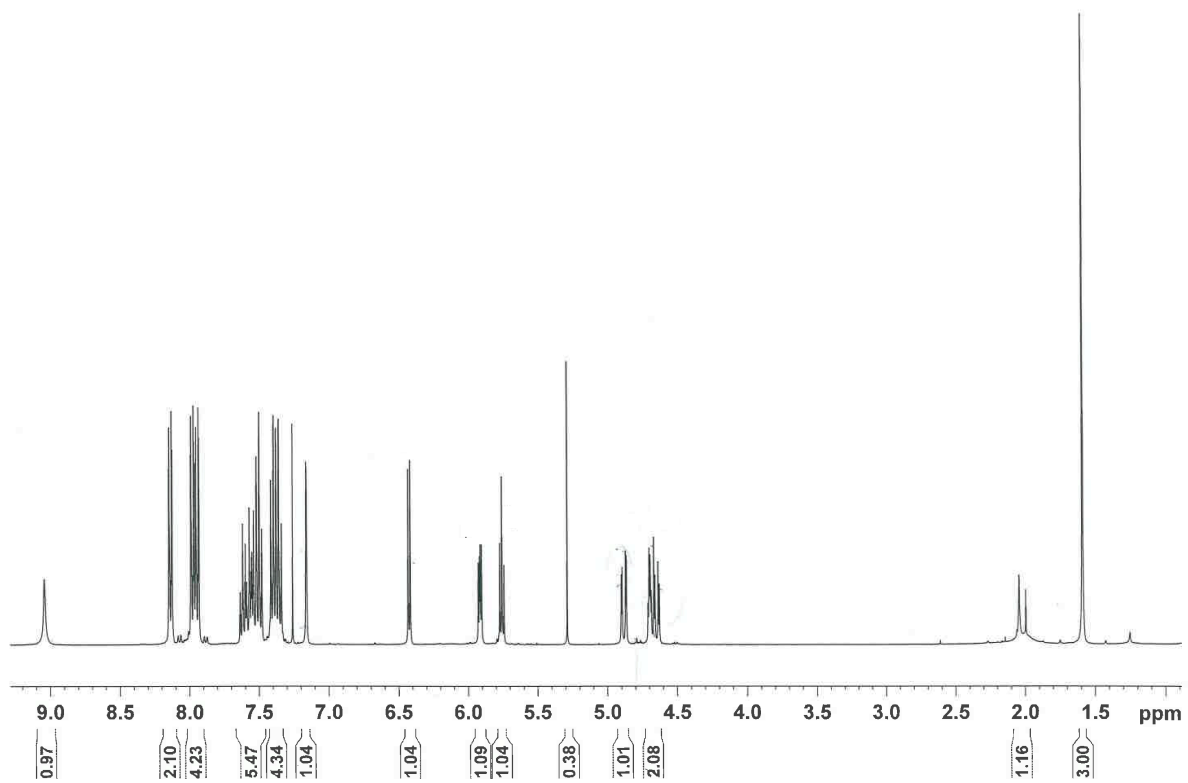

Figure S6.  $^1\text{H}$  NMR of 7.

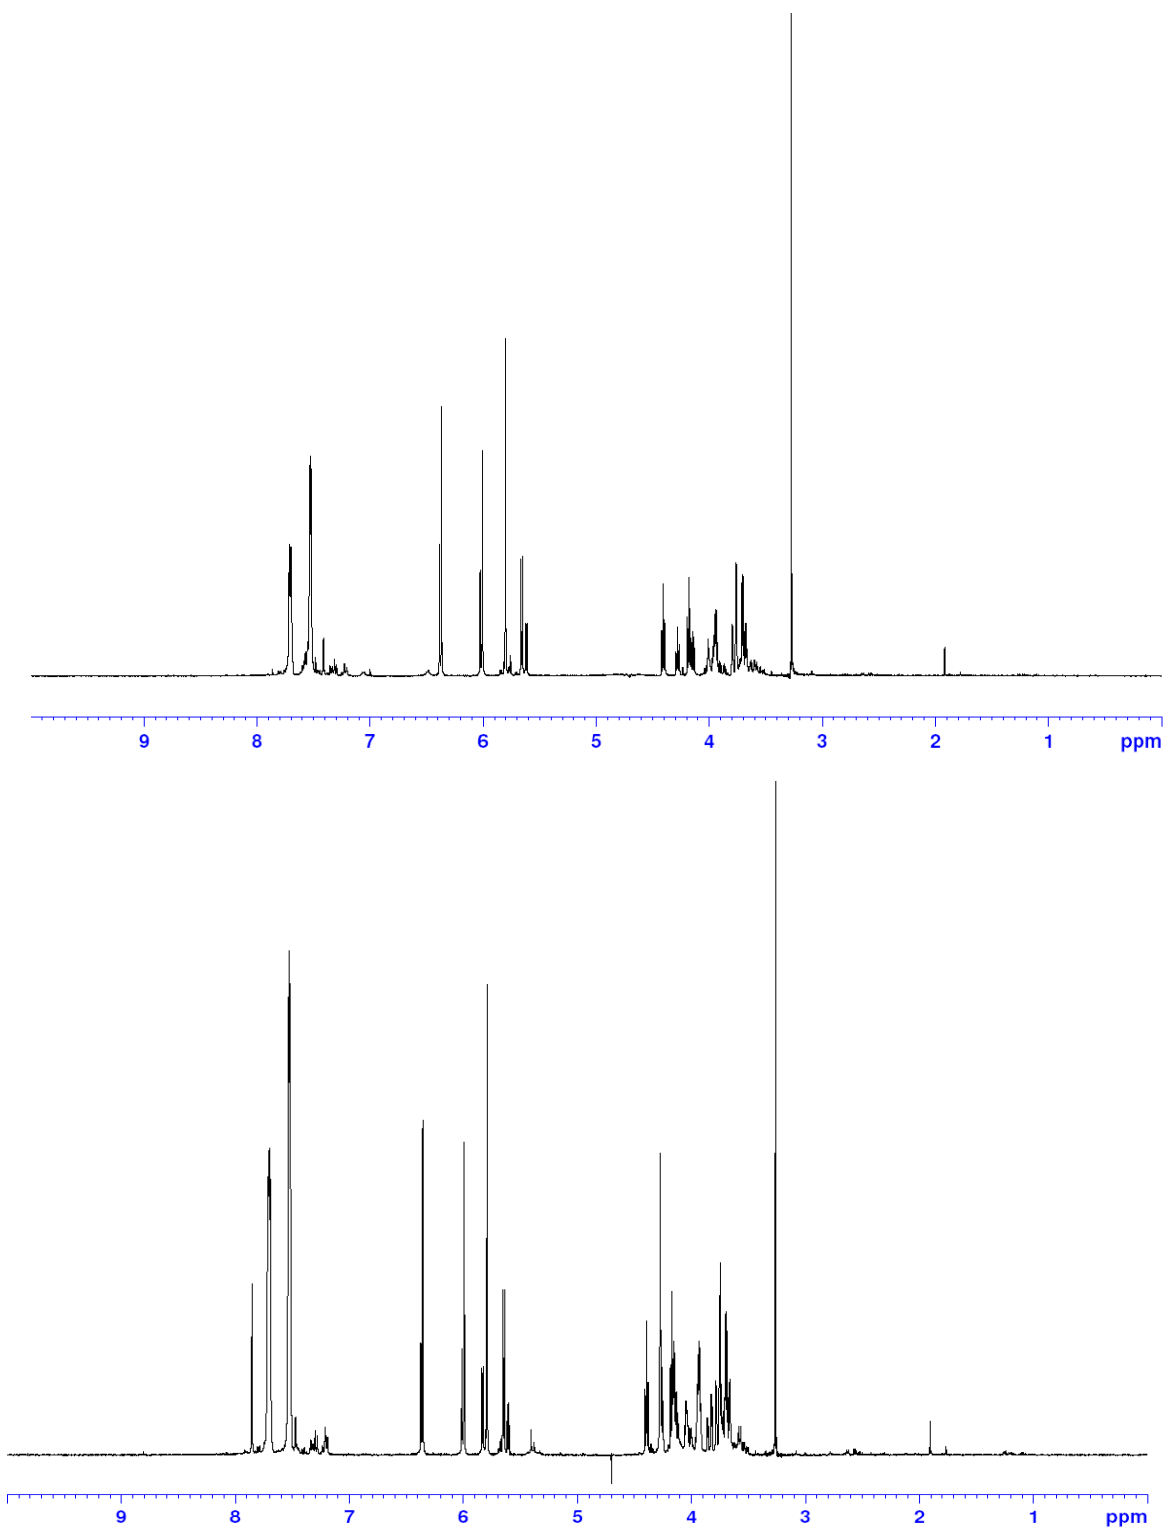

**Figure S7.** <sup>1</sup>H NMR of oxidation of **9** by H<sub>2</sub>O<sub>2</sub> with H<sub>2</sub>O solvent suppression. Top: After 15 min; Bottom: after 18 h.



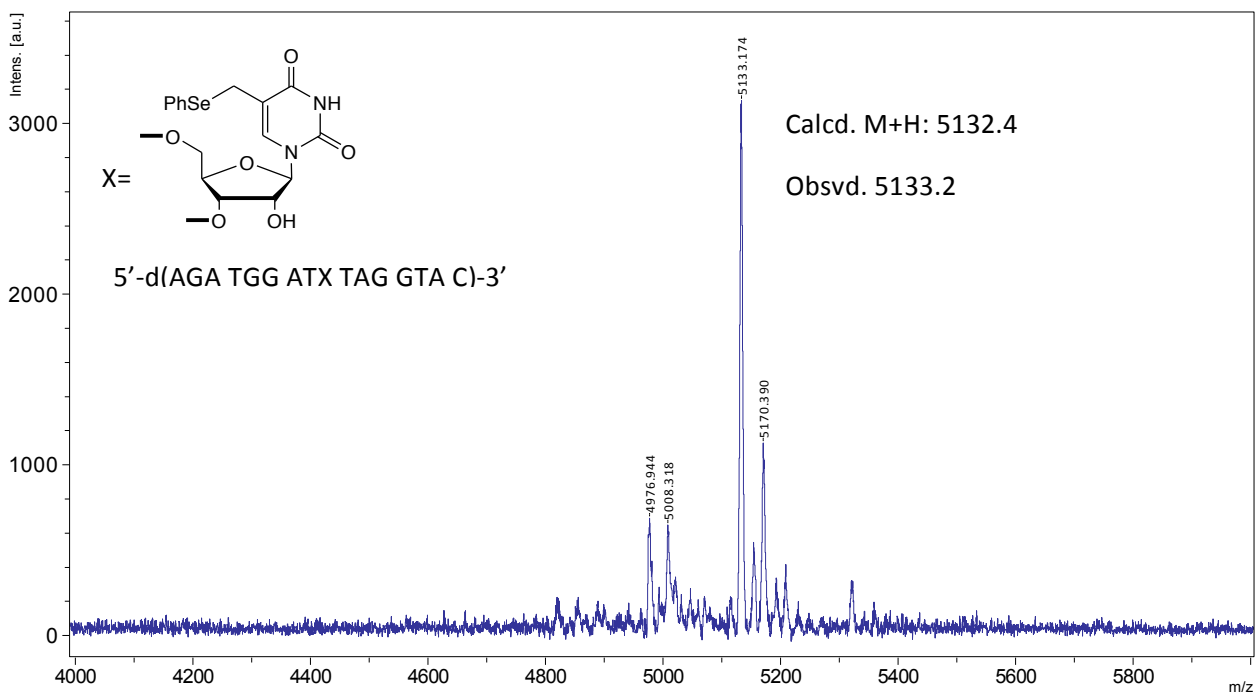

**Figure S8.** MALDI-TOF MS of **13**; m/z 4976 corresponds to photolyzed thymidine, m/z 5008 corresponds to the peroxy adduct, m/z 5170 corresponds to the potassium salt

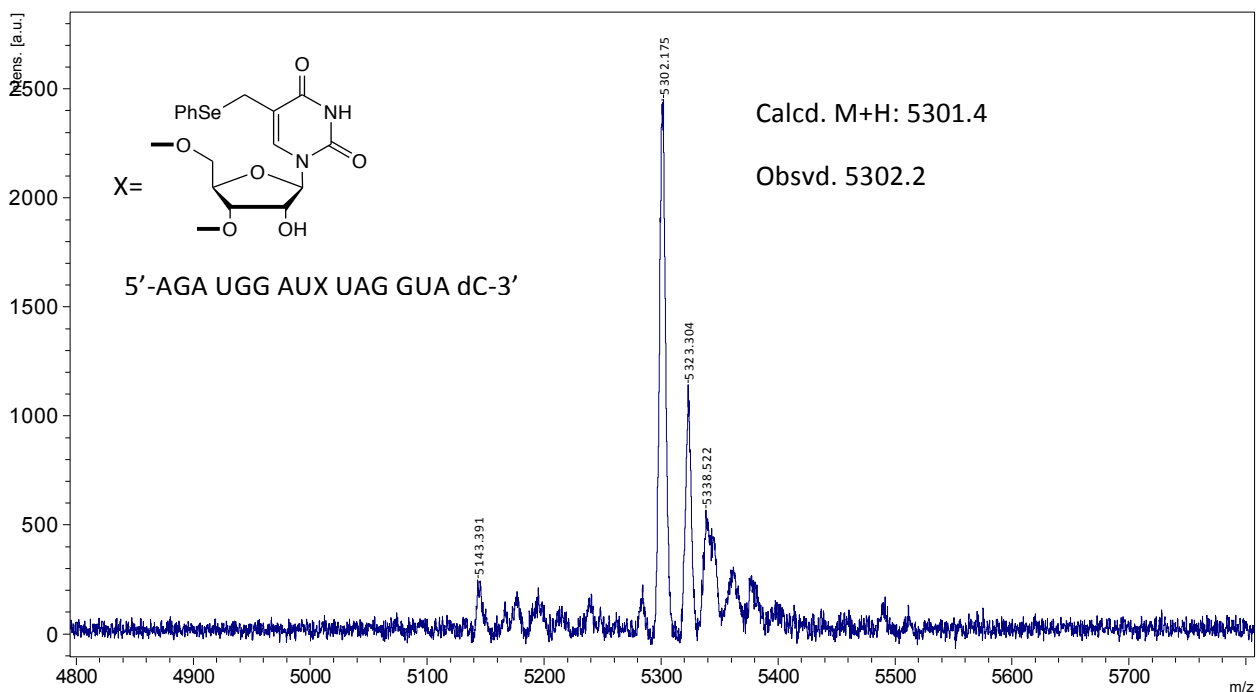

**Figure S9.** MALDI-TOF MS of **14**; m/z 5323 and 5338 correspond to the sodium and potassium salt, respectively; m/z 5143 corresponds to photolyzed thymidine

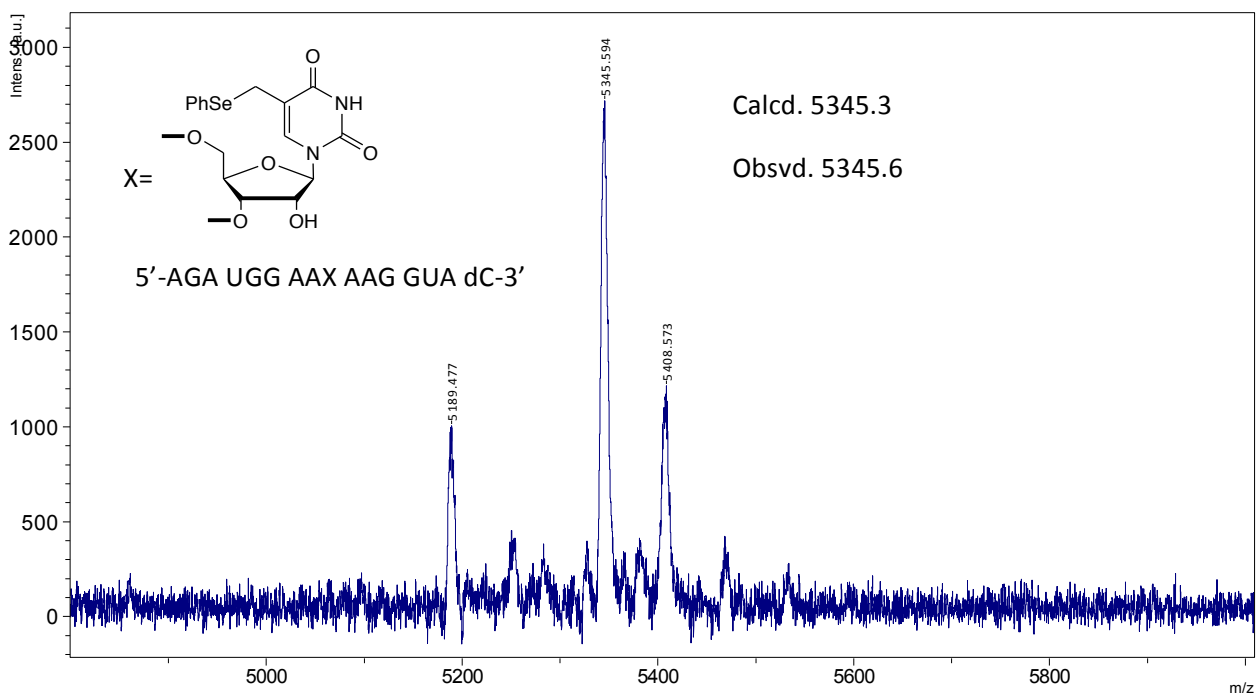

**Figure S10.** MALDI-TOF MS of **15**; m/z 5189 is photolyzed thymidine, m/z 5408 is the potassium salt

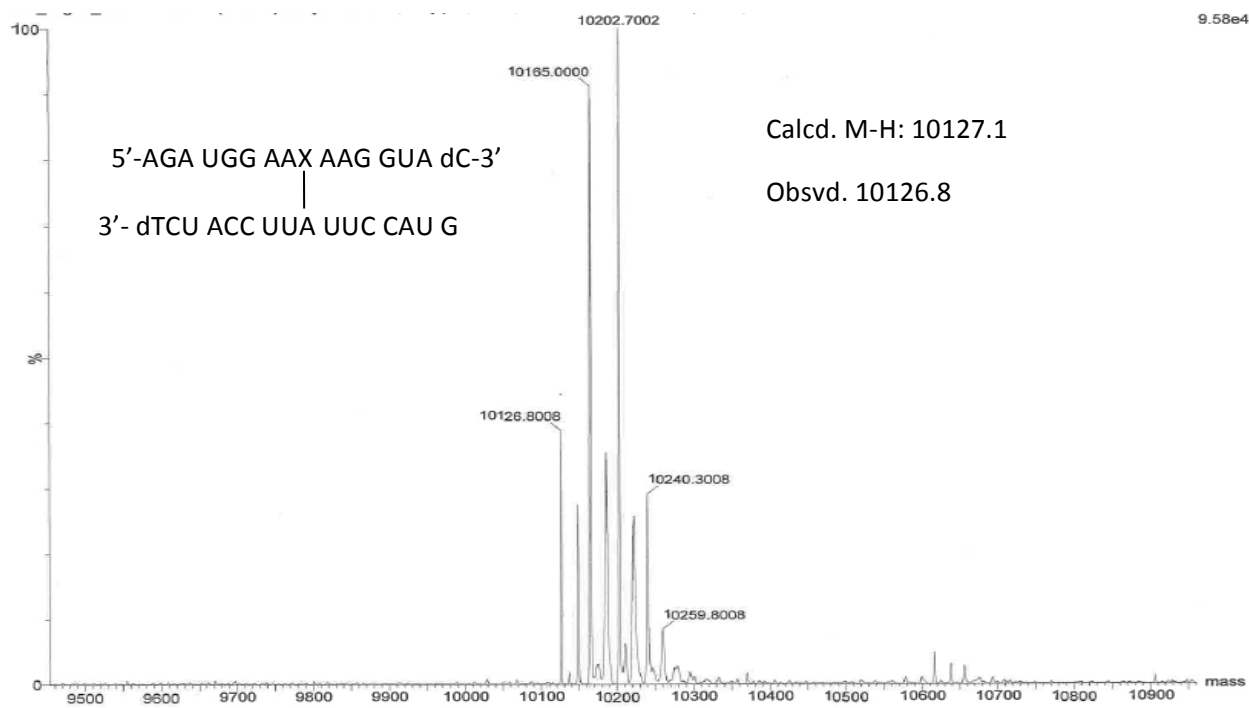

**Figure S11.** LC-MS of ICL **23**; m/z between 10165 and 10259 correspond to a mixture of sodium and potassium salts of the ICL

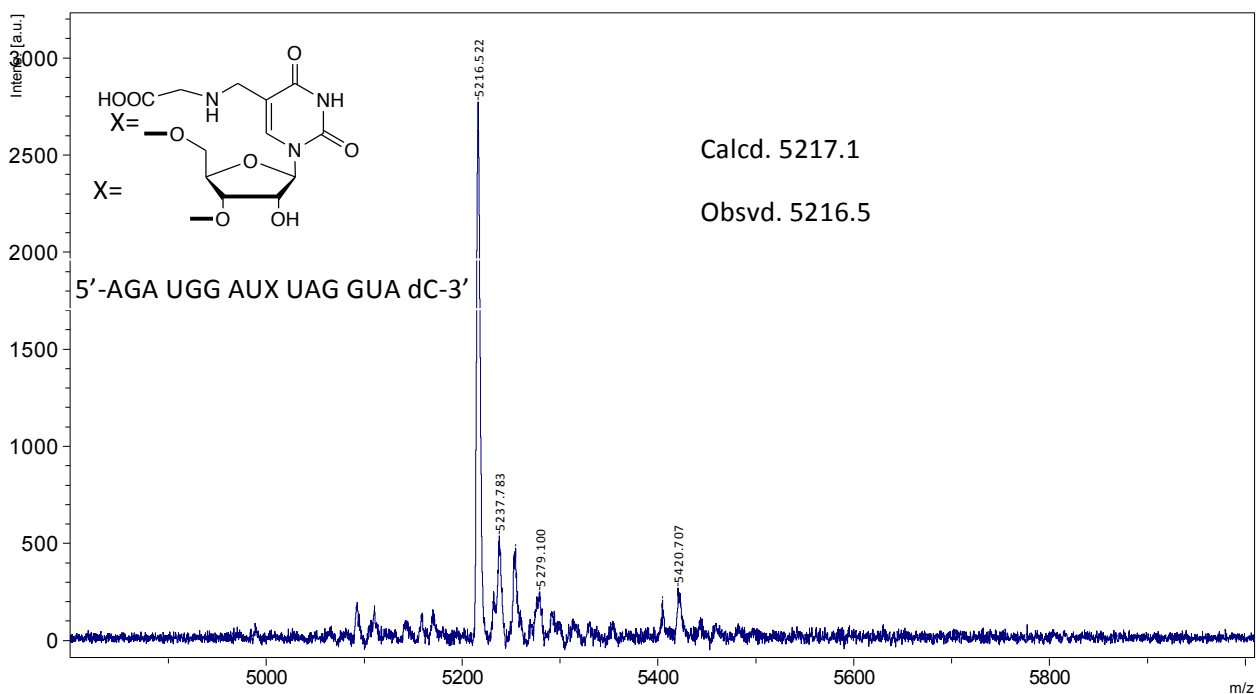

**Figure S12.** MALDI-TOF MS of the glycine adduct (**24a**); m/z greater than 5237 correspond to a mixture of sodium and potassium salts

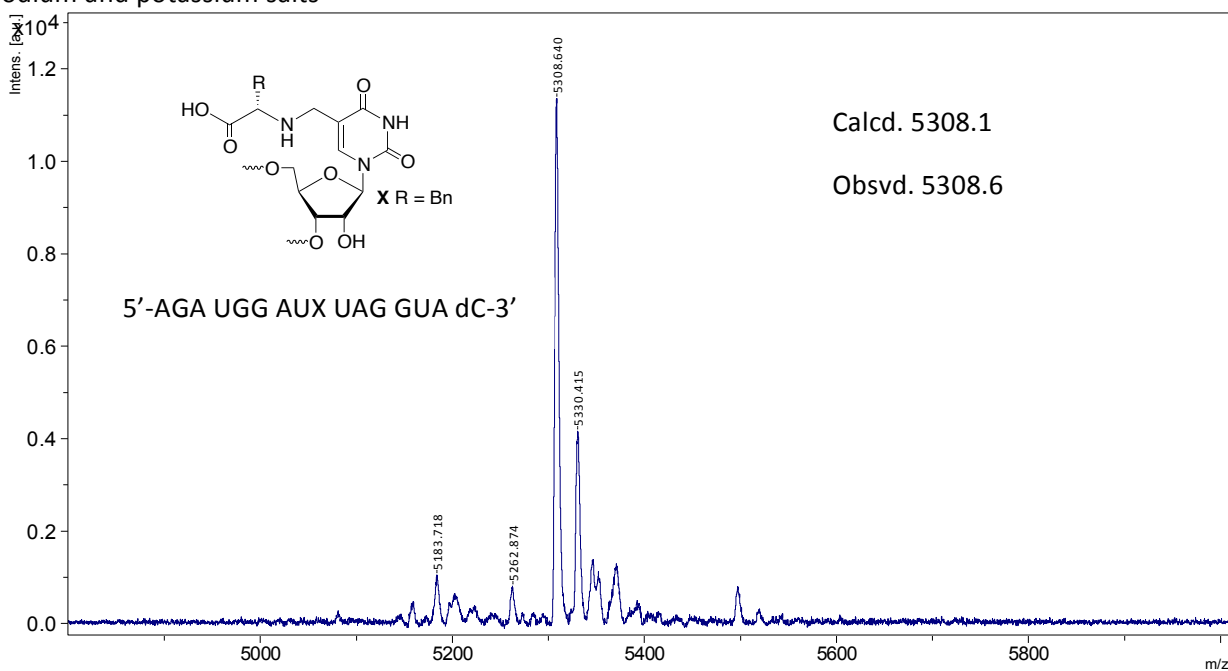

**Figure S13.** MALDI-TOF MS of the phenylalanine adduct (**24b**); m/z 5183 and 5262 corresponds to reaction side products, m/z greater than 5330 correspond to a mixture of sodium and potassium salts

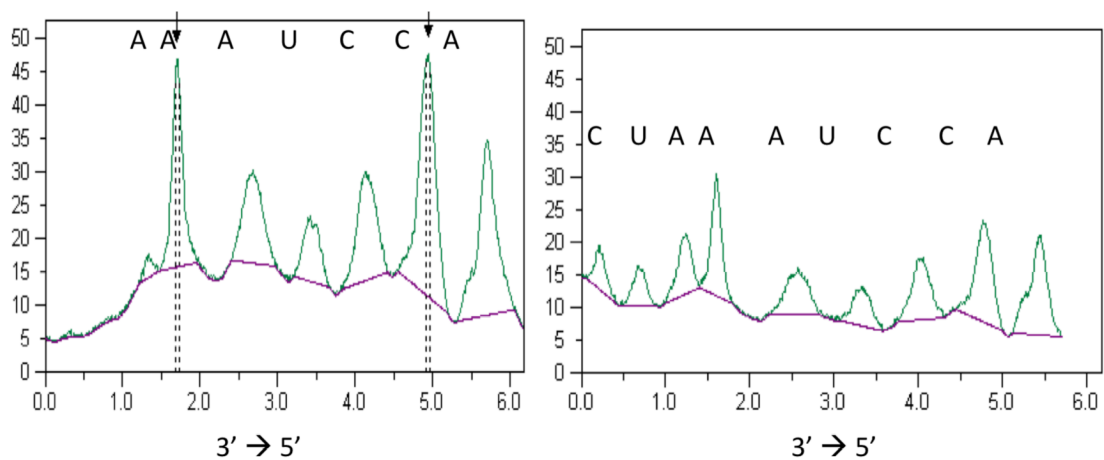

**Figure S14.** Histogram of hydroxyl radical cleavage of ICL from **19a** (**23**). Left: ICL; Right: Duplex precursor

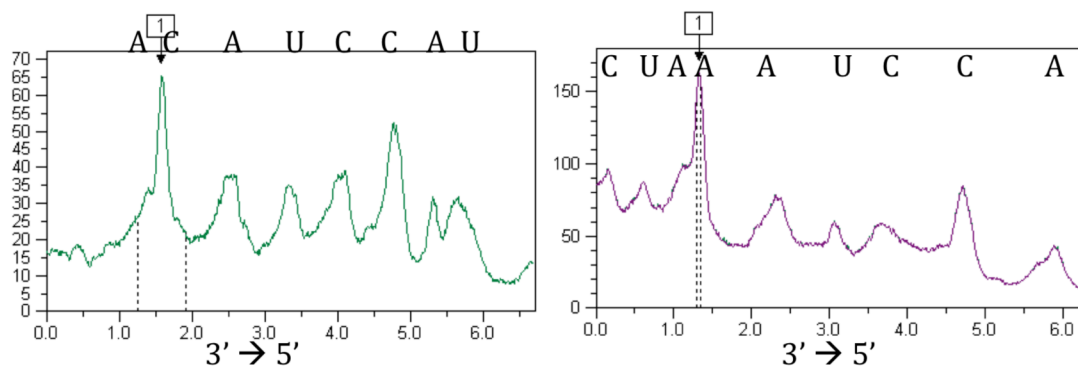

**Figure S15.** Histogram of hydroxyl radical cleavage of ICL from **21b** (**9** opposite cytidine). Left: ICL; Right: Duplex precursor

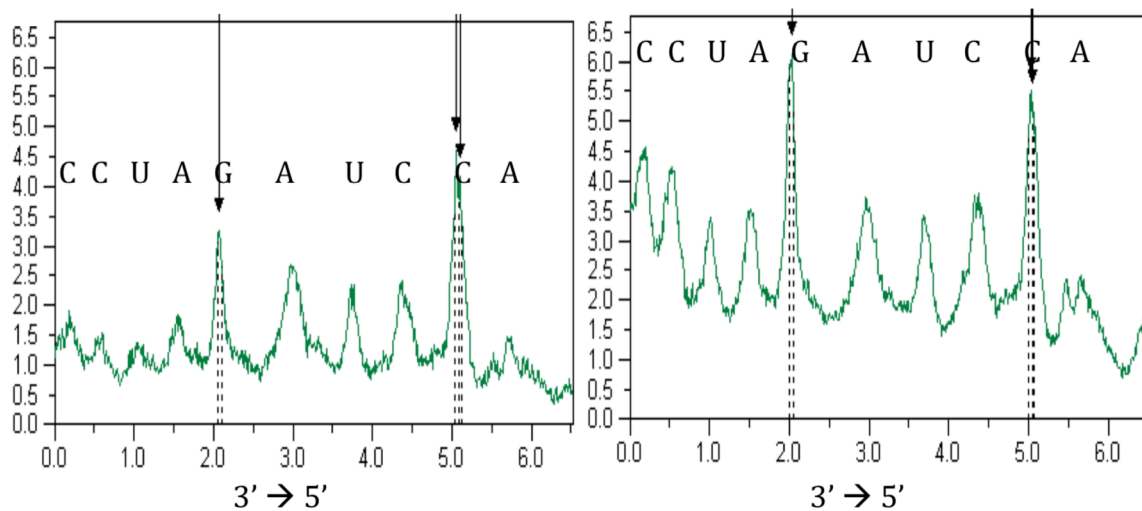

**Figure S16.** Histogram of hydroxyl radical cleavage of ICL from **21a** (9 opposite guanosine). Left: ICL; Right: Duplex precursor

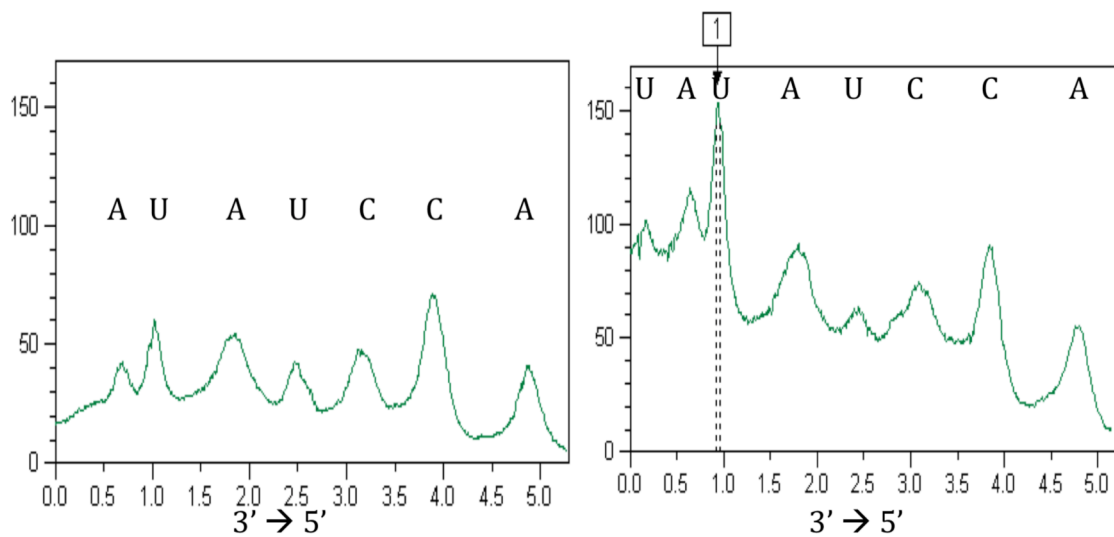

**Figure S17.** Histogram of hydroxyl radical cleavage of ICL from **21c** (9 opposite uridine). Left: ICL; Right: Duplex precursor
